# Supplementary material for: Novel genetically encoded tools for imaging or silencing neuropeptide release from presynaptic terminals in vivo
Source: PubMed Central journal article supplement — bioRxiv. 2023 Jan 20:2023.01.19.524797. Preprint. [Version 1] doi: 10.1101/2023.01.19.524797 (PMC9882317; doi:10.1101/2023.01.19.524797), 2023-01-20
Supplement: NIHPP2023.01.19.524797v1-supplement-1.pdf [file NIHPP2023.01.19.524797v1-supplement-1.pdf]

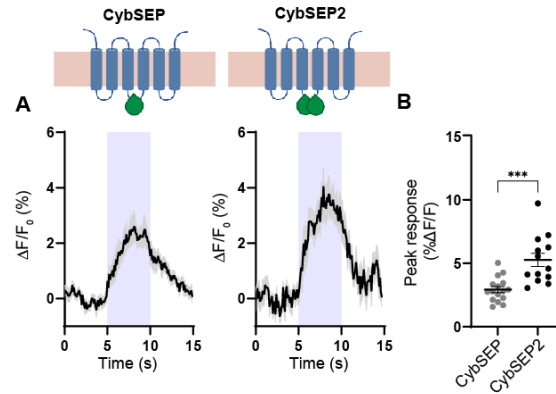

843

844 **Figure S1. Comparison of fluorescence levels of CybSEP and CybSEP2 evoked by electrical**  
845 **stimulation**

846 (A and B) Schematic and average traces showing comparison between CybSEP (n = 18) and CybSEP2 (n  
847 = 13) expressing cells (duplicated from Figures 1G) during electrical stimulation at 100 Hz and  
848 quantification of percent  $\Delta F/F_0$  peak intensity in (A) (\*\*\*) p < 0.001 via unpaired t test). Data are represented  
849 as mean  $\pm$  SEM.

850

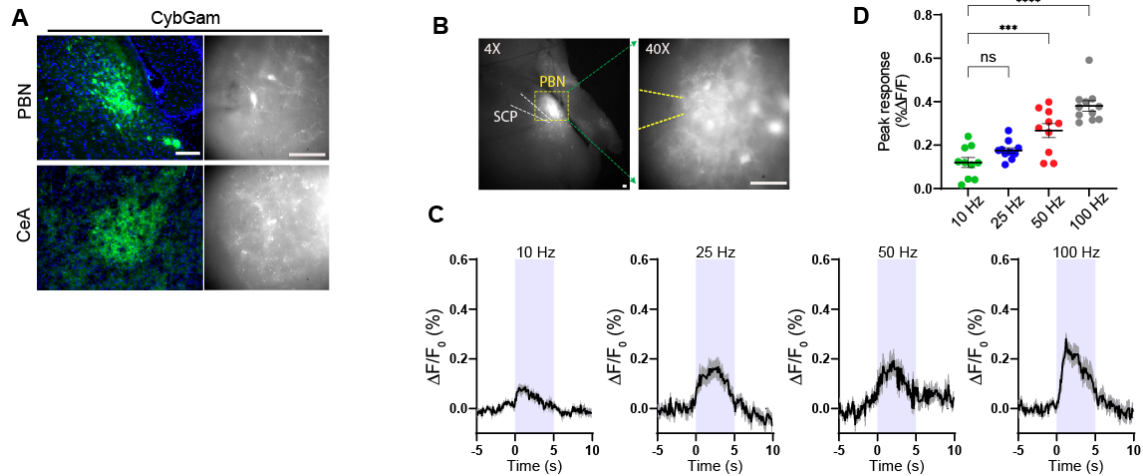

851

852 **Figure S2. Expression of CybGam and imaging CybSEP2 in acute brain slice containing the PBN**

853 (A) Schematic and images showing expression of CybGam in the PBN and the CeA of *Calca<sup>Cre/+</sup>*.

854 (B) Images of PBN showing CybSEP2 expression for slice imaging. SCP indicates superior cerebellar  
855 peduncle (Scale bar, 100 μm).

856 (C and D) Average traces of fluorescence change in response to various electrical stimulation and  
857 quantification of data in (C) (10-12 traces from 18 slices prepared from 3 mice; \*\*\*p < 0.001, \*\*\*\*p <  
858 0.0001 via one way ANOVA followed by Tukey's multiple comparisons to the 10 Hz). Data are represented  
859 as mean ± SEM.

860

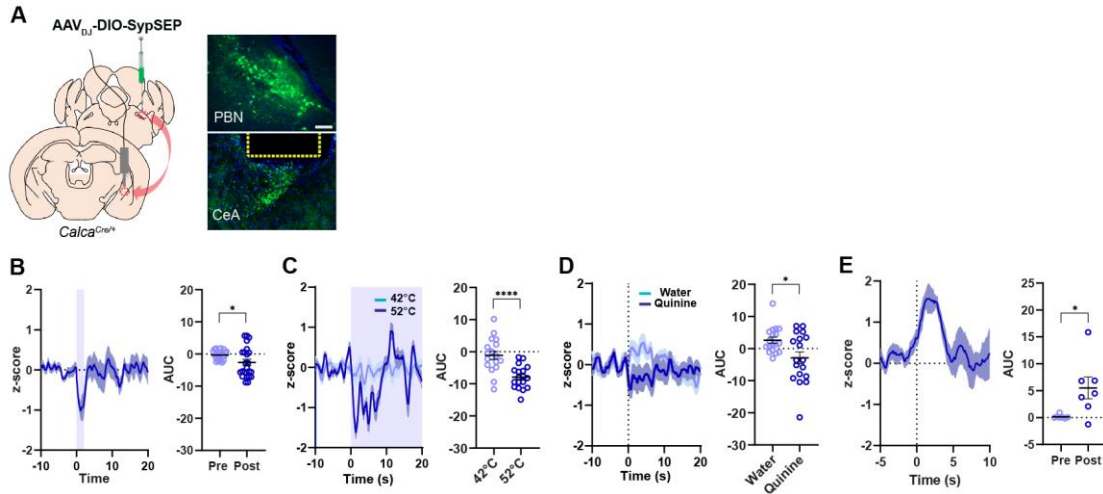

861

862 **Figure S3. Deep brain recording of the SV sensor in the synaptic terminals of freely moving mice**

863 (A) Schematic illustration of viral injection and images showing expression of SypSEP in the PBN and in  
864 the CeA of *Calca<sup>Cre/+</sup>*. Yellow dot line represents the location of optic fiber (Scale bar, 100  $\mu$ m).

865 (B) Average trace of fluorescence change on footshock and quantification of data 10 s before and after  
866 footshock (23 traces from 4 mice; \* $p < 0.05$  via paired t test).

867 (C) Average traces of fluorescence change during thermal stimulus and quantification of data for 0-10 s (18  
868 traces from 4 mice; \*\*\*\* $p < 0.0001$  via unpaired t test).

869 (D) Average traces of fluorescence change during quinine intake and quantification of data for 0-10 s (18  
870 traces from 4 mice \* $p < 0.05$  via unpaired t test). Data are represented as mean  $\pm$  SEM.

871 (E) Average traces of fluorescence change during Ensure intake and quantification of data for 0-10 s (7  
872 traces from 3 mice \* $p < 0.05$  via unpaired t test). Data are represented as mean  $\pm$  SEM.

873

874

875

876

877

878

879

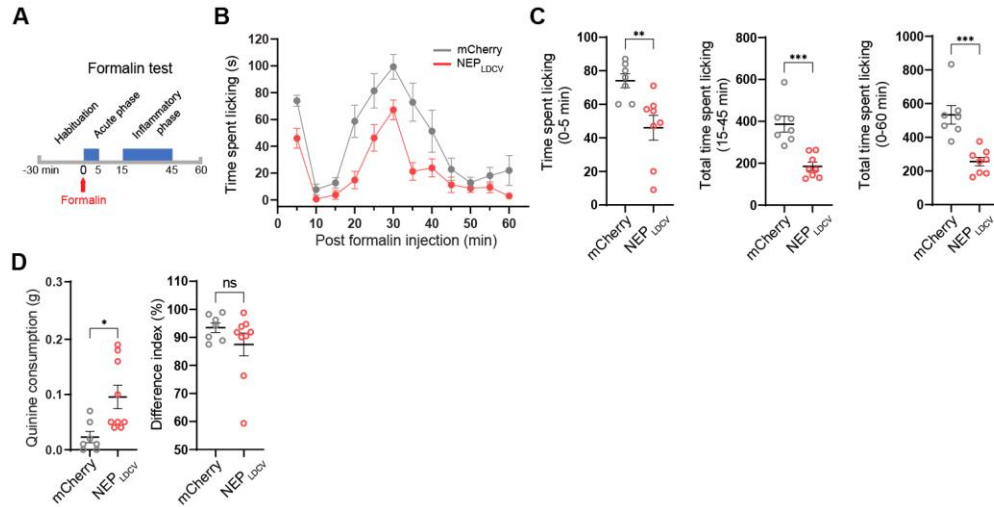

880  
881  
882  
883  
884  
885  
886  
887  
888  
889  
890

**Figure S4. The effect of the NEP<sub>LDCV</sub> on pain behavior by sensory stimulus and formalin injection.**

(A) Schematic of formalin assay for acute and inflammatory pain tests.

(B) Time course of formalin-induced nociceptive responses in the mice expressing mCherry (n=7 for mCherry, n=9 for NEP<sub>LDCV</sub>).

(C) Quantification of acute phase (0-5 min, left), inflammatory phase (15-45 min, middle), and a total spent time for licking (0-60 min). \*\*P<0.01, \*\*\*P<0.001 via unpaired t-test comparisons to mCherry. Data are represented as mean ± SEM.

(D) Quinine consumption (left) and two bottle (right) tests. in the mice expressing mCherry (n = 7) and NEP<sub>LDCV</sub> (n = 9). \*P<0.05, ns via unpaired t-test comparisons to mCherry group.

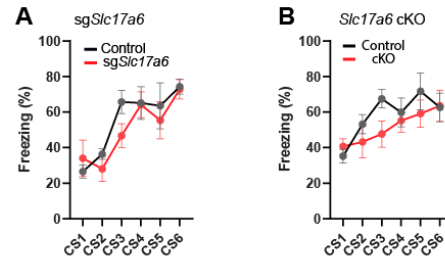

891

892 **Figure S5** Learning curves during fear conditioning.

893 (A) Freezing during tone (CS) in learning sessions (n = 4 for control, n = 6 for *sgSlc17a6*).

894 (B) Freezing during tone (CS) in learning sessions (n = 7 for control, n = 6 for cKO).

895
